# Supplementary material for: Iron-chelated semiconducting oligomer nanoparticles for NIR-II fluorescence imaging-guided enhanced chemodynamic/photothermal combination therapy
Source: Royal Society of Chemistry journal article supplement (doi:10.1039/d3tb01305g), 2023-01-01
Supplement: d3tb01305g1.pdf [file d3tb01305g1.pdf]

## **Electronic Supplementary Information**

### **Iron-Chelated Semiconducting Oligomer Nanoparticles for NIR-II Fluorescence Imaging-Guided Enhanced Chemodynamic/Photothermal Combination Therapy**

Shanchao Diao, Wenheng Shi, Yaxin Liu, Tingting Liang, Zhiwei Xu, Wen Zhou\*, Chen Xie\*, and Quli Fan\*

State Key Laboratory of Organic Electronics and Information Displays & Institute of Advanced Materials (IAM), Nanjing University of Posts & Telecommunications, 9 Wenyuan Road, Nanjing 210023, China.

Corresponding author, E-mail: [iamwzhou@njupt.edu.cn](mailto:iamwzhou@njupt.edu.cn); [iamcxie@njupt.edu.cn](mailto:iamcxie@njupt.edu.cn);  
[iamqlfan@njupt.edu.cn](mailto:iamqlfan@njupt.edu.cn)

## 1. Supporting figures

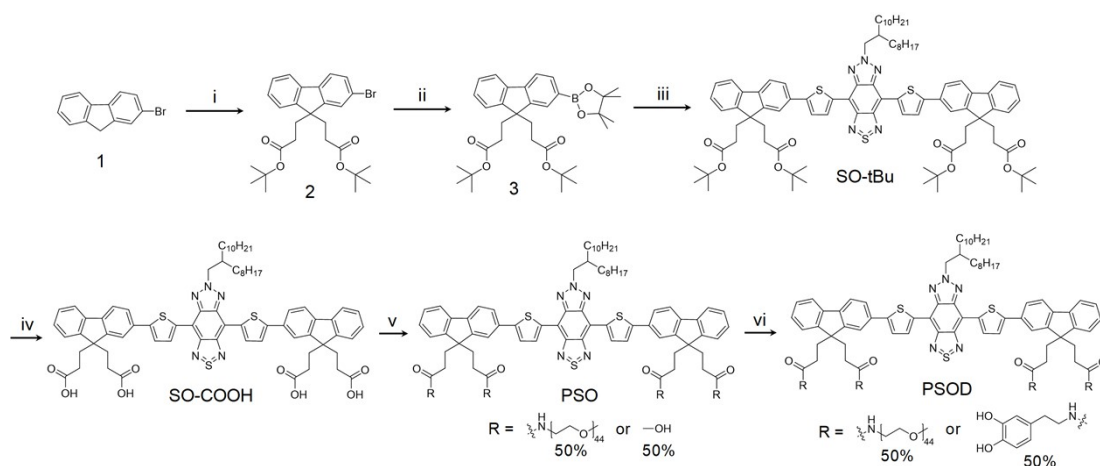

**Scheme S1** Synthetic route of PSOD. Reagents and conditions: i) tert-butyl acrylate, tetrabutylammonium bromide, KOH, toluene, N<sub>2</sub>, 25 °C, 12 h; ii) Pd(dppf)<sub>2</sub>Cl<sub>2</sub>, bis(pinacolato)diboron, KOAc, dimethylformamide (DMF), 90 °C, 12 h; iii) benzothiadiazolethiophenedibromide (TBZ-Br), methyltrioctylammonium chloride, K<sub>2</sub>CO<sub>3</sub>, Pd(PPh<sub>3</sub>)<sub>4</sub>, H<sub>2</sub>O, toluene, 100 °C, 24 h; iv) trifluoroacetic acid (TFA), CH<sub>2</sub>Cl<sub>2</sub>, room temperature, 24 h; v) mPEG-NH<sub>2</sub>, N,N'-diisopropylcarbodiimide (DIC), 4-dimethylaminopyridine (DMAP), tetrahydrofuran (THF), N<sub>2</sub>, room temperature, 48 h; vi) 3-hydroxytyramine hydrochloride, DIC, DMAP, THF, N<sub>2</sub>, room temperature, 24 h.

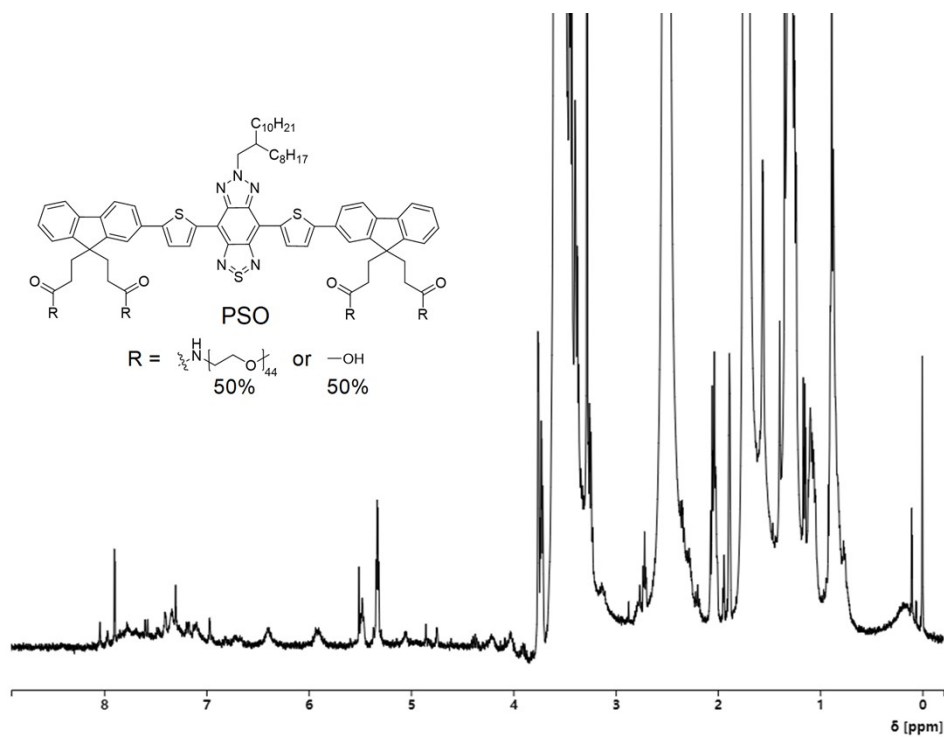

**Fig. S1**  $^1\text{H}$  NMR spectrum of PSO. THF- $d_4$  was used as the solvent.

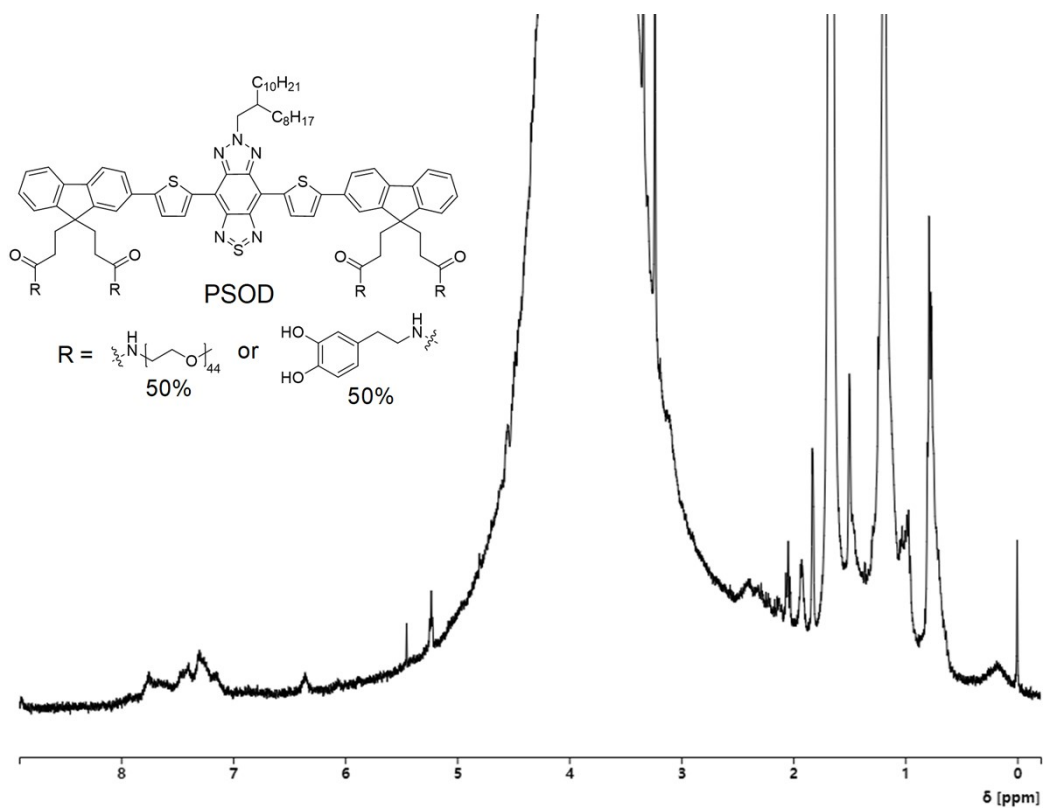

**Fig. S2**  $^1\text{H}$  NMR spectrum of PSOD. THF- $d_4$  was used as the solvent.

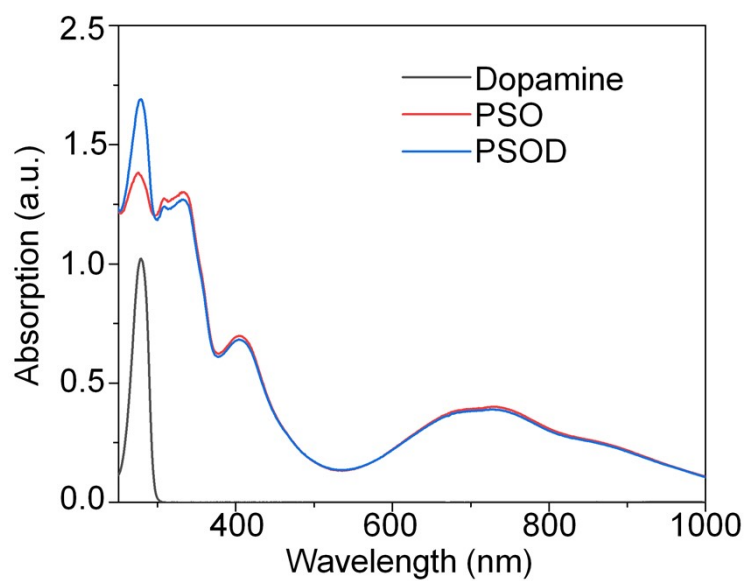

**Fig. S3** Absorption spectra of dopamine, PSO and PSOD in water.

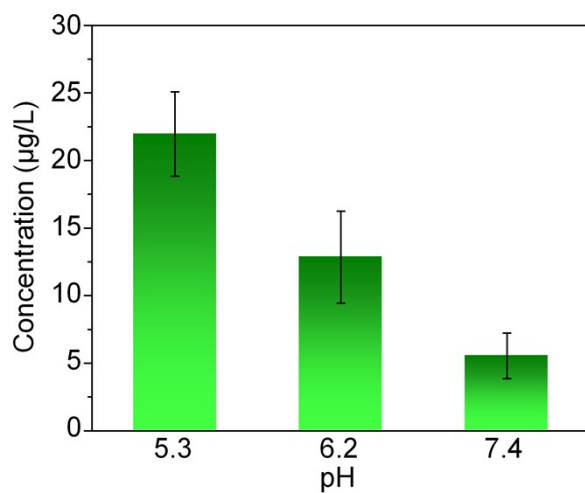

**Fig. S4.** Concentration of Fe<sup>3+</sup> ion in DHA@FePSOD solution under different pH.

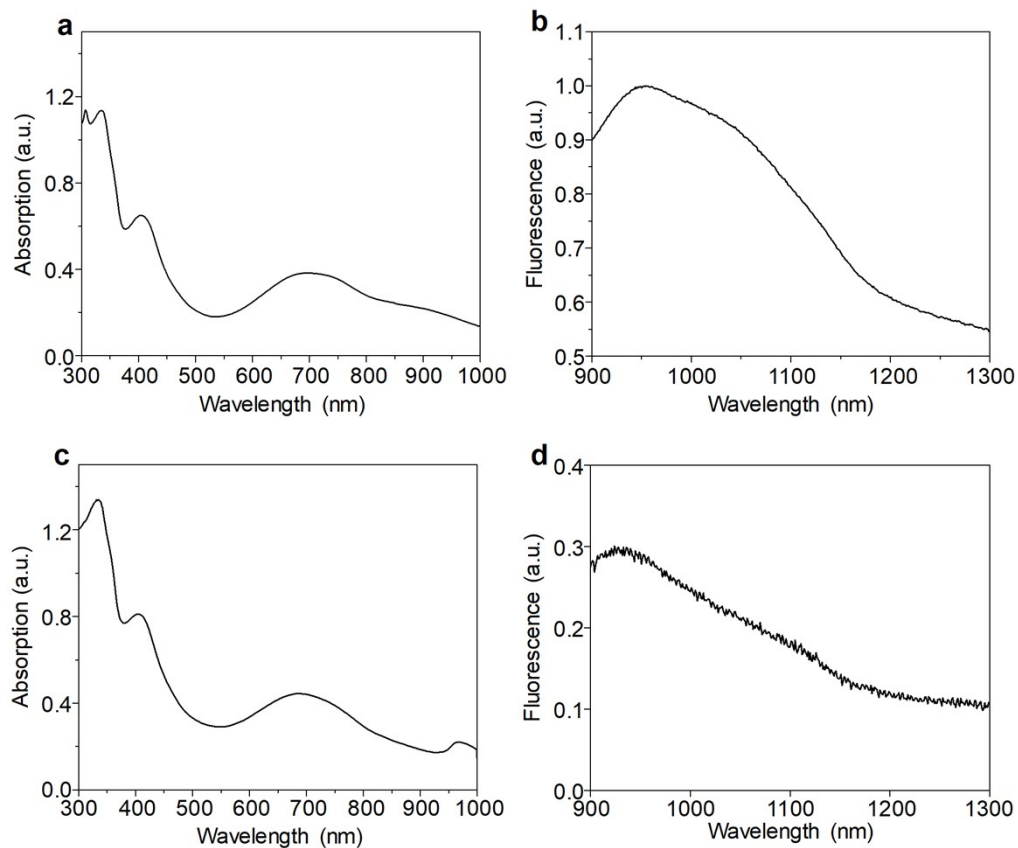

**Fig. S5** Absorption (a) and emission (b) spectra of PSOD in PBS (pH 7.4). Absorption (c) and emission (d) spectra of FePSOD in PBS (pH 7.4).

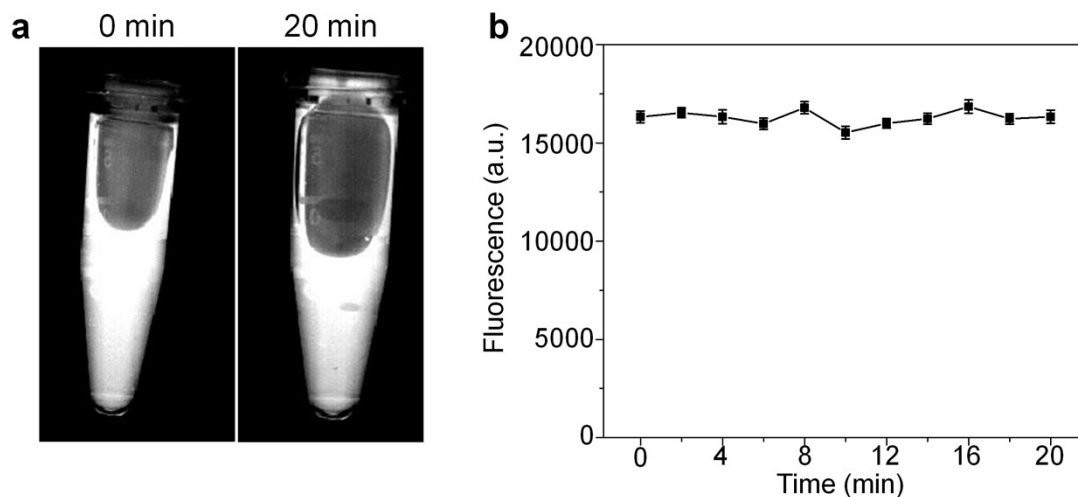

**Fig. S6** (a) NIR-II fluorescence images of DHA@FePSOD solution before and after 20 min continuous laser irradiation (808 nm, 1 W/cm<sup>2</sup>). (b) NIR-II fluorescence intensity changes of DHA@FePSOD under continuous laser irradiation (808 nm, 1 W/cm<sup>2</sup>) for 20 min. The error bars represent standard deviations of three separate measurements.

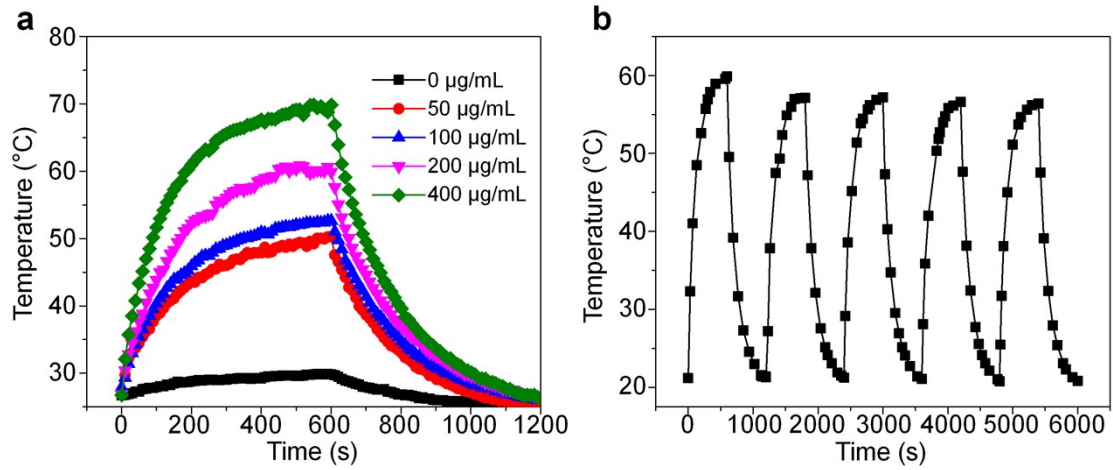

**Fig. S7** (a) Heating and natural cooling curves of FePSOD with different concentrations under 808 nm laser irradiation ( $1 \text{ W/cm}^2$ , 10 min). (b) Thermal stability of FePSOD under heating and natural cooling cycles.

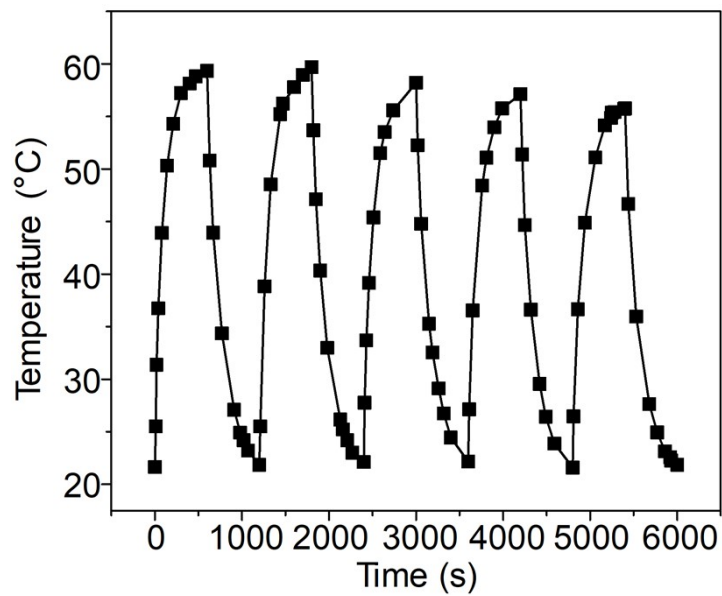

**Fig. S8** Thermal stability of DHA@FePSOD under heating and natural cooling cycles.

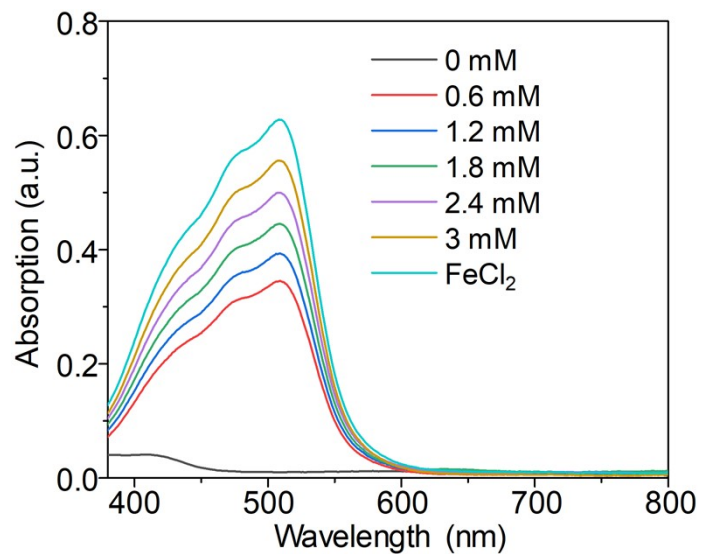

**Fig. S9** Absorption of 1,10-phenanthroline under treatment of FePSOD (200  $\mu\text{g/mL}$ ) and different concentrations of GSH.

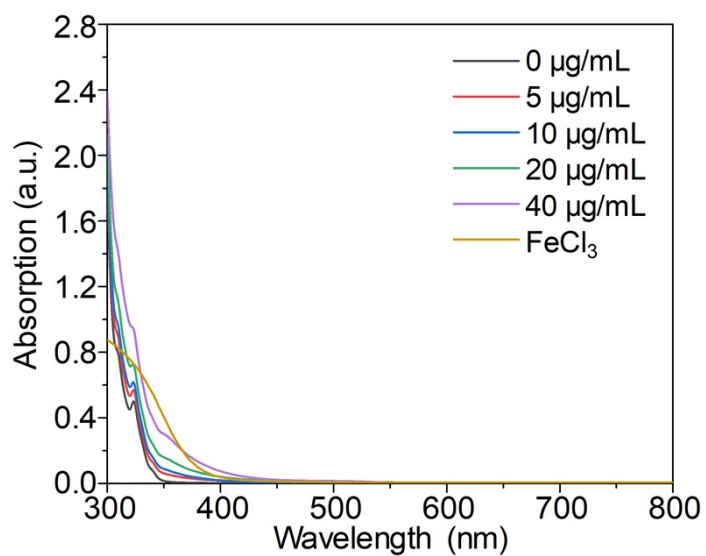

**Fig. S10.** Absorption spectra of  $\text{Fe}^{3+}$  ion and 1,10-phenanthroline incubated  $\text{Fe}^{3+}$  under different concentrations.

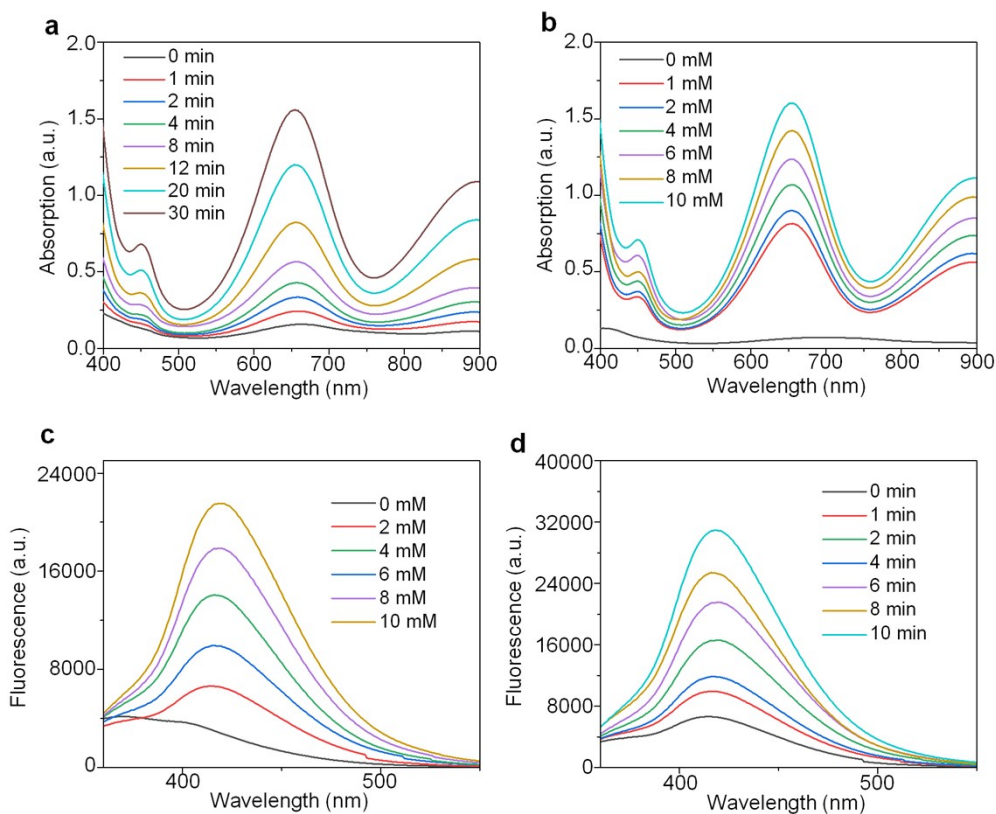

**Fig. S11** (a) Absorption spectra of TMB under treatment of FePSOD (100 μg/mL), GSH (3 mM) and H<sub>2</sub>O<sub>2</sub> (10 mM) at different incubation time. (b) Absorption spectra of TMB under treatment of FePSOD (100 μg/mL), GSH (3 mM) and different concentrations of H<sub>2</sub>O<sub>2</sub>. (c) Fluorescence spectra of 1,4-dicarboxybenzene under treatment of FePSOD (100 μg/mL), GSH (3 mM) and different concentrations of H<sub>2</sub>O<sub>2</sub>. (d) Fluorescence spectra of 1,4-dicarboxybenzene under treatment of FePSOD (100 μg/mL), GSH (3 mM) and H<sub>2</sub>O<sub>2</sub> (10 mM) at different incubation time.



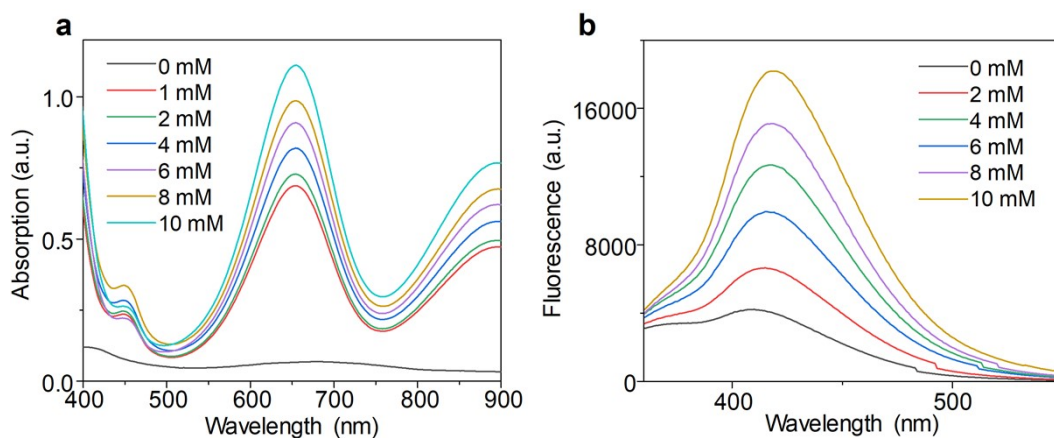

**Fig. S12** (a) Absorption spectra of TMB under treatment of DHA@FePSOD (2 mg/mL), GSH (3 mM) and different concentrations of H<sub>2</sub>O<sub>2</sub>. (b) Fluorescence spectra of 1,4-dicarboxybenzene under treatment of DHA@FePSOD (2 mg/mL), GSH (3 mM) and different concentrations of H<sub>2</sub>O<sub>2</sub>.

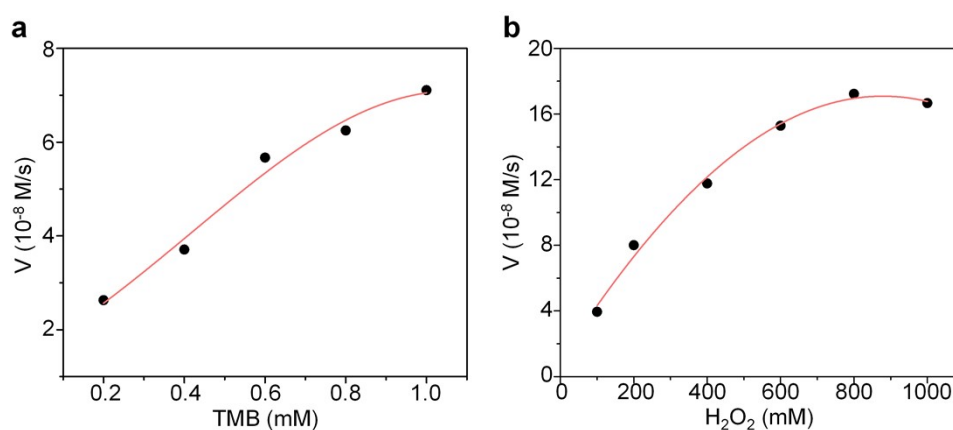

**Fig. S13.** (a) Michaelis-Menten curve of hydroxyl radical generation velocities versus TMB (a) or H<sub>2</sub>O<sub>2</sub> (b) in the presence of DHA@FePSOD.

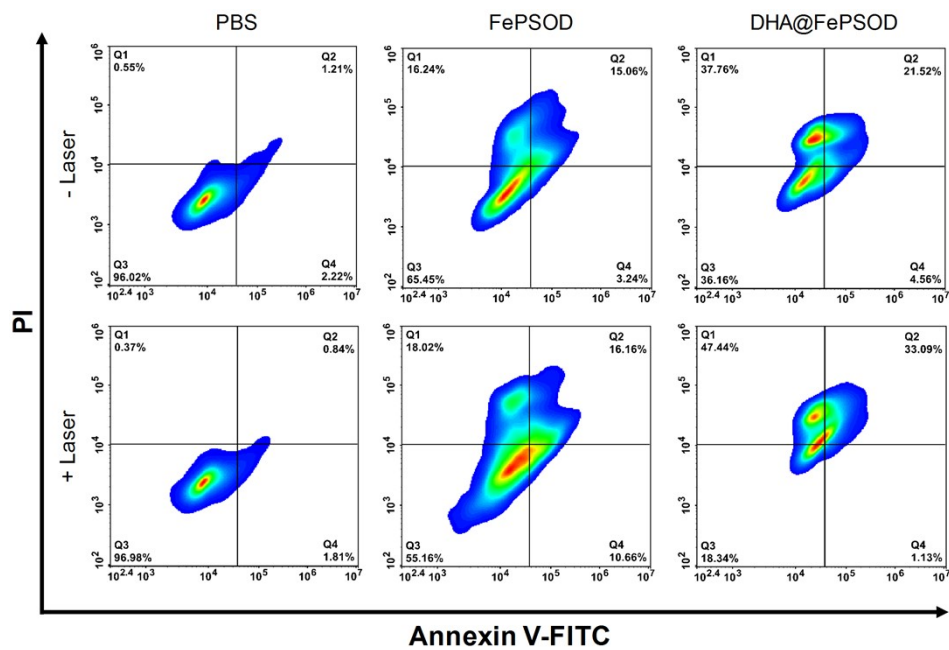

**Fig. S14** Flow cytometry analysis of viability of 4T1 cells under different treatments.

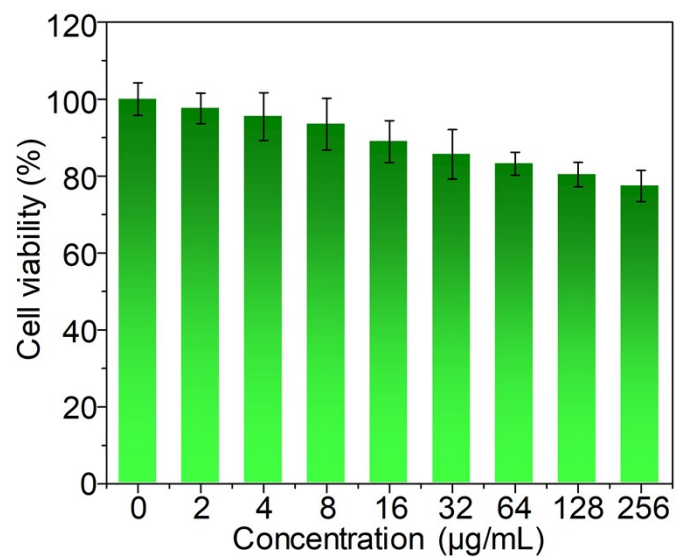

**Fig. S15.** Viability of NIH-3T3 cells treated with different concentrations of DHA@FePSOD without laser irradiation.

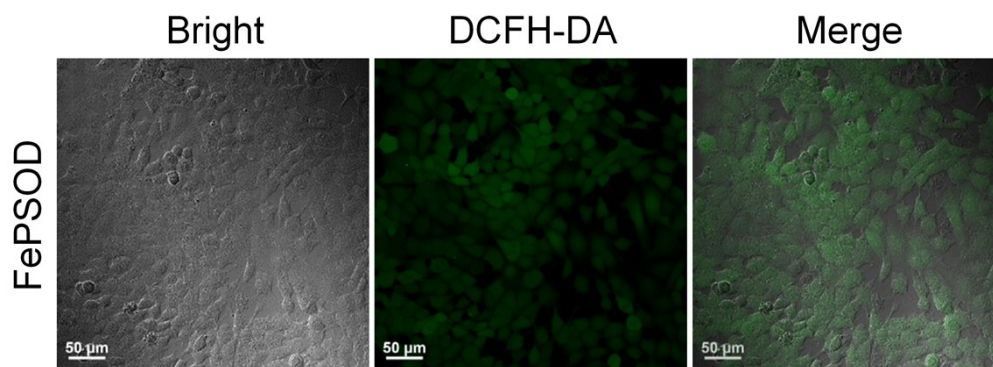

**Fig. S16** Confocal fluorescence images of DCFH-DA-treated 4T1 cells incubated with FePSOD.

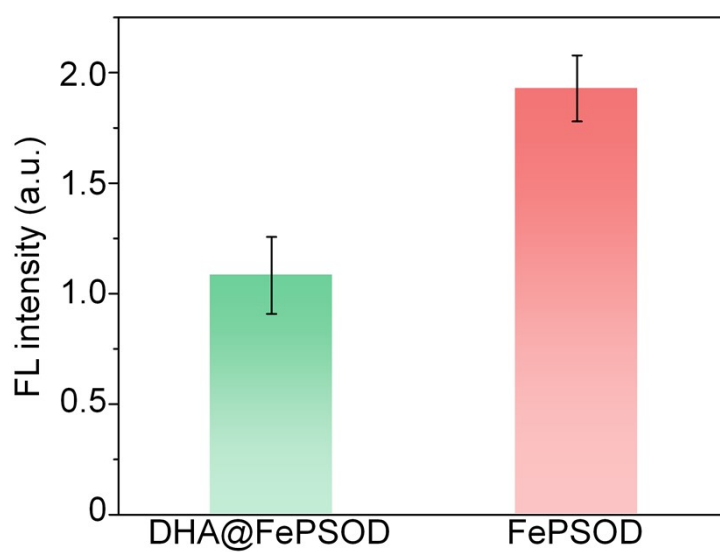

**Fig. S17.** Quantification of green fluorescence intensities from DCFH-DA-treated 4T1 cells incubated with FePSOD or DHA@FePSOD.

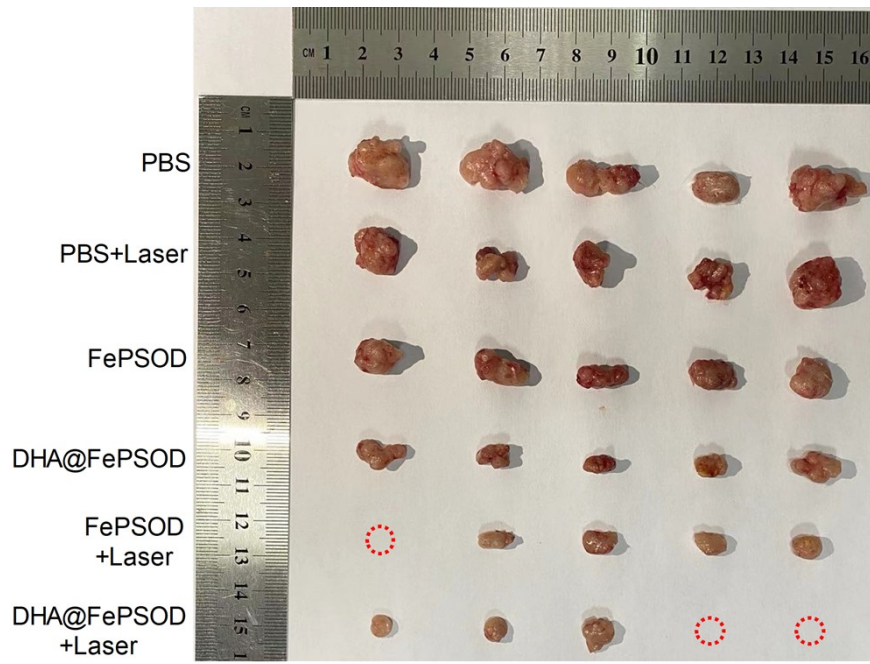

**Fig. S18** Images of tumor resected from different treatment groups at  $t = 16$  day.
